# Supplementary material for: La advocación de Nuestra Señora de la O
Source: MDPI journal article supplement (doi:10.3390/jcm11113000), 1998-01-01
Supplement: s1 [file s1]

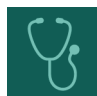

Article

# Specular Microscopy of Human Corneas Stored in an Active Storage Machine

Thibaud Garcin <sup>1,2,\*</sup>, Emmanuel Crouzet <sup>2</sup>, Chantal Perrache <sup>2</sup>, Thierry Lepine <sup>2,3</sup>, Philippe Gain <sup>1,2</sup> and Gilles Thuret <sup>1,2,4</sup>

<sup>1</sup> Ophthalmology Department, University Hospital, 42000 Saint-Etienne, France; philippe.gain@univ-st-etienne.fr (P.G.); gilles.thuret@univ-st-etienne.fr (G.T.)

<sup>2</sup> Corneal Graft Biology, Engineering and Imaging Laboratory, BiiGC, EA2521, Federative Institute of Research in Sciences and Health Engineering, Faculty of Medicine, Jean Monnet University, Rue de la Marandière, 42000 Saint-Etienne, France; e.crouzet@univ-st-etienne.fr (E.C.); chantal.perrache@univ-st-etienne.fr (C.P.); thierry.lepine@institutoptique.fr (T.L.).

<sup>3</sup> Laboratory Hubert Curien, Optics Institute Graduate School, 42000 Saint-Etienne, France

<sup>4</sup> Institut Universitaire de France, Boulevard Saint-Michel, 75005 Paris, France

\* Correspondence: t.garcin@univ-st-etienne.fr; Tel.: +33-(0)4-77-12-77-93; Fax: +33-(0)4-77-12-09-95

## SUPPLEMENTARY DATA

### Number of cells counted per image (Table S1)

For the 1-month storage study, the overall mean number of counted cells per SM image was  $1364 \pm 510$  (range 224–3022) at each time point. The mean number of counted cells per SM image increased over time (ANOVA,  $P < 0.001$ ): at D2  $1008 \pm 426$  cells (range 224–3022), at D26  $1437 \pm 415$  cells (range 813–2630), at D28  $1646 \pm 470$  cells (range 949–2866). The final endothelial assessment with HoeschtECD allowed extra-large wide field of analysis with a mean of  $4768 \pm 1769$  nuclei cells (range 2751–9122) analyzed per image.

For the 3-month storage study, the overall mean number of counted cells per SM image was  $1353 \pm 194$  (range 877–1729) at each time point. The mean number of counted cells per SM image increased similarly over time (ANOVA,  $P < 0.001$ ): at D2  $1033 \pm 105$  cells (range 877–1286), at D23  $1241 \pm 95$  cells (range 1085–1456), at D44  $1360 \pm 81$  cells (range 1282–1597), at D65  $1433 \pm 88$  cells (range 1284–1583), at D86  $1493 \pm 68$  cells (range 1355–1657), and at D88  $1558 \pm 67$  cells (range 1475–1729). The final endothelial assessment HoeschtECD allowed extra-large wide field of analysis with a mean of  $3235 \pm 266$  nuclei cells (range 2954–4035) analyzed per image.

**Citation:** Garcin, T.; Crouzet, E.; Perrache, C.; Lepine, T.; Gain, P.; Thuret, G. Specular Microscopy of Human Corneas Stored in an Active Storage Machine. *J. Clin. Med.* **2022**, *11*, 3000. <https://doi.org/10.3390/jcm11113000>

Academic Editors: Vito Romano, Yalin Zheng and Mariantonia Ferrara

Received: 6 April 2022

Accepted: 24 May 2022

Published: 26 May 2022

**Publisher's Note:** MDPI stays neutral with regard to jurisdictional claims in published maps and institutional affiliations.

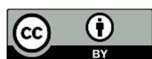

**Copyright:** © 2022 by the authors. Licensee MDPI, Basel, Switzerland. This article is an open access article distributed under the terms and conditions of the Creative Commons Attribution (CC BY) license (<https://creativecommons.org/licenses/by/4.0/>).

**Table S1.** Number of cells counted per image in the 1 and 3-month studies.

| 1-month Study [8]  | D2       | D26      | D28      | Final Hoechst |         |         |               |
|--------------------|----------|----------|----------|---------------|---------|---------|---------------|
| Mean N of cells±SD | 1008±426 | 1437±415 | 1646±470 | 4768±1769     |         |         |               |
| 3-month Study [9]  | D2       | D23      | D44      | D65           | D86     | D88     | Final Hoechst |
| Mean N of cells±SD | 1033±105 | 1241±95  | 1360±81  | 1433±88       | 1493±68 | 1558±67 | 3235±266      |

N = number analyzed ; D = day ; SD = standard deviation

Thanks to our custom SM, a precise follow-up of the same area all along the storage was possible. **Figure S1** and **Video S1** highlight EC redistribution over three months.

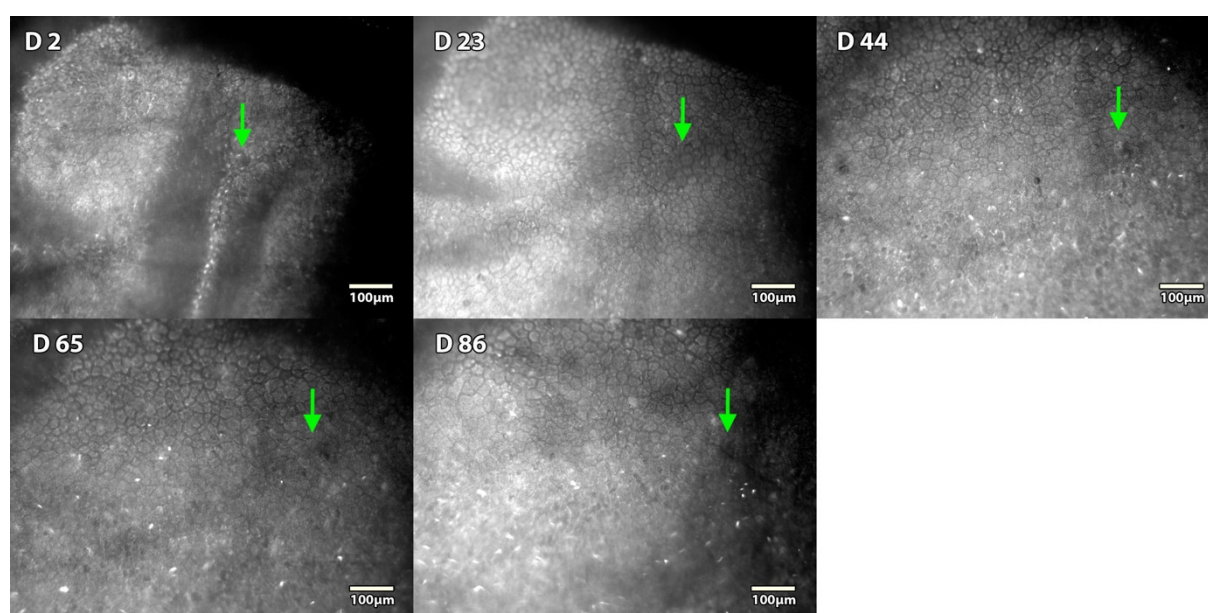

**Figure S1.** Time lapse of the same endothelial area followed during three months in the active storage machine. The same area for each field was precisely acquired repeatedly from Day 2 to Day 86 thanks to micrometric stage of our specular microscope. Green arrow indicated the redistribution of endothelial cells at the same point of the field. Endothelial cell density decreased over time, with larger cells, a progressive slight increased polymorphism and pleiomorphism.

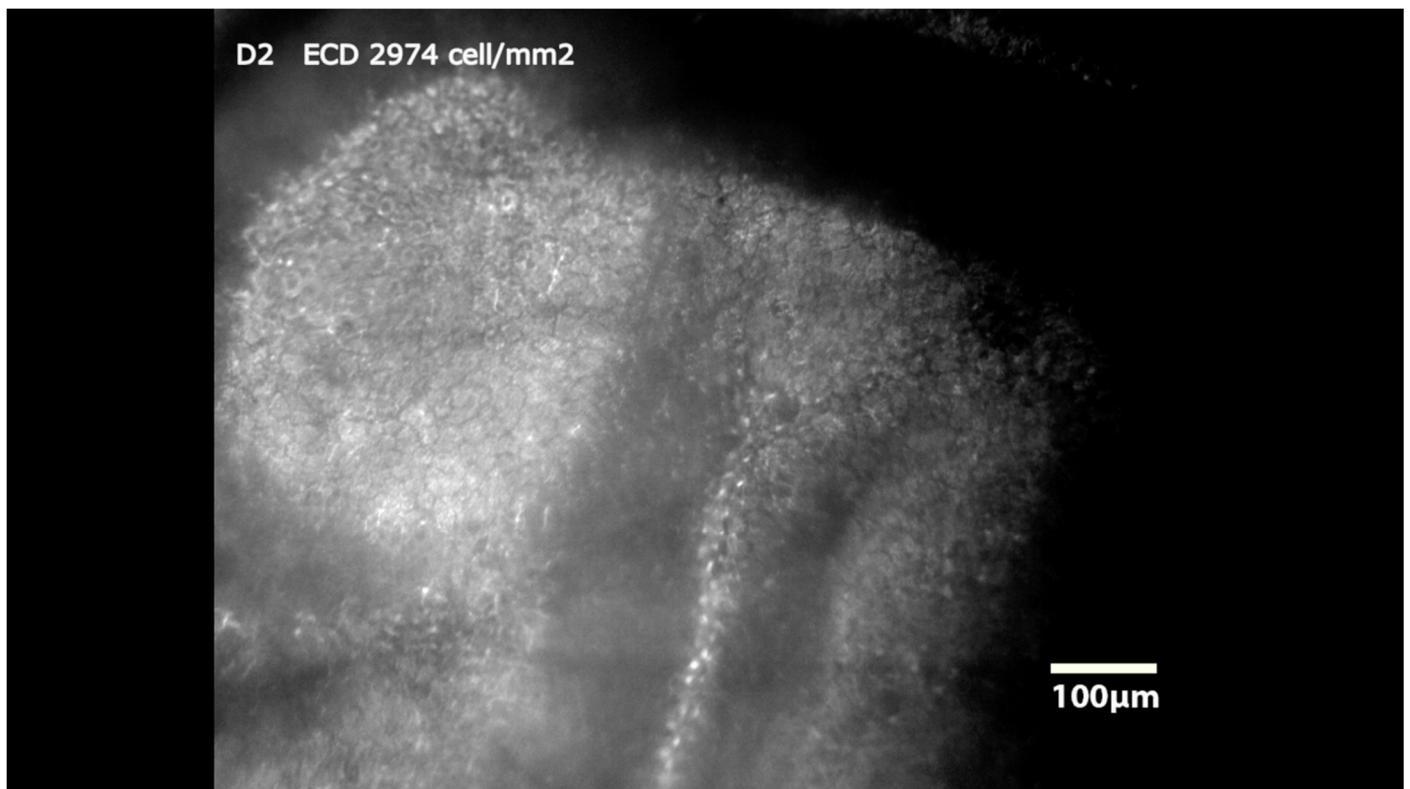

**Video S1.** Time lapse showing EC redistribution over three months.

Our custom allowed movie recording in the same area, by modulating depth on Z axis (**Video S2**).

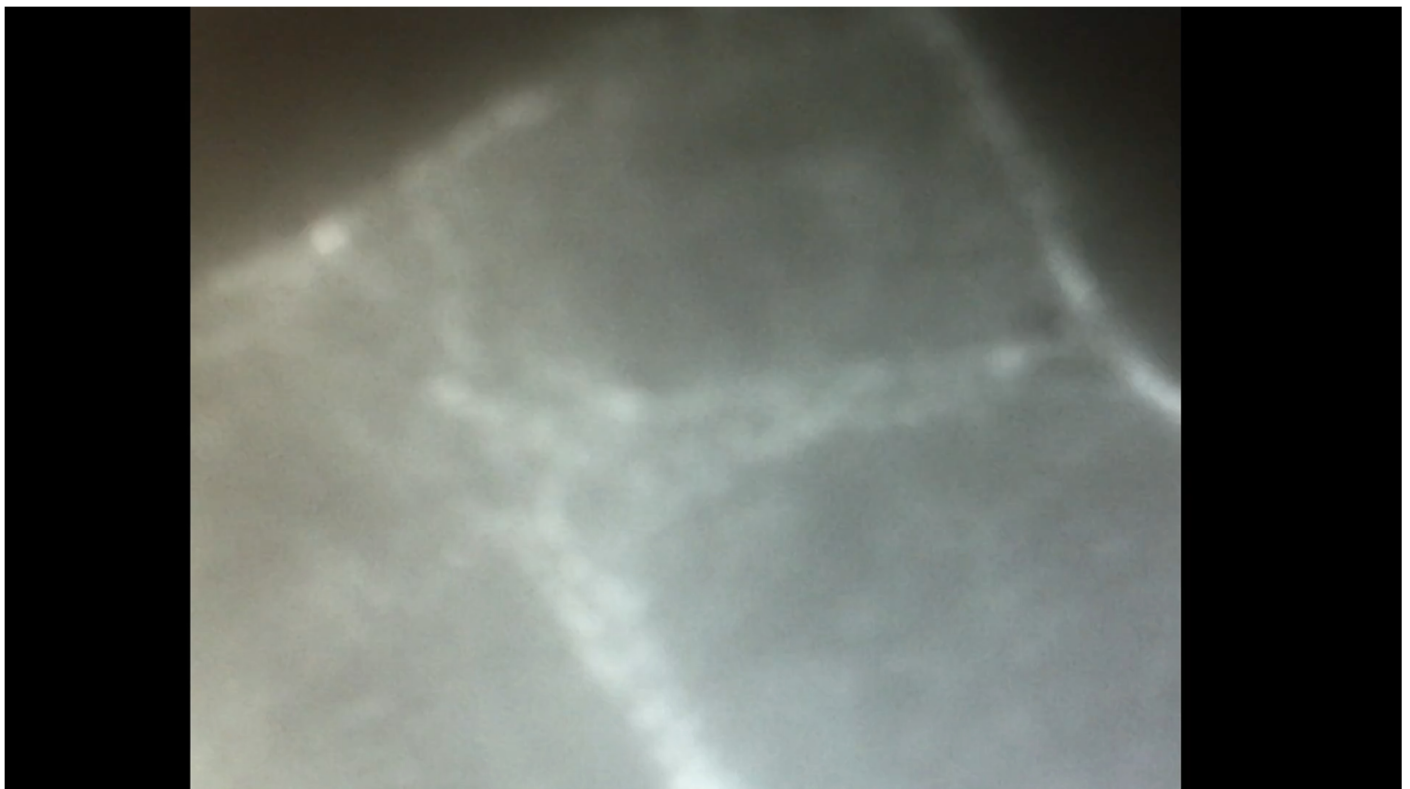

**Video S2.** Movie recording example on a defined area.
